# Supplementary material for: Westdrive X LoopAR: An Open-Access Virtual Reality Project in Unity for Evaluating User Interaction Methods during Takeover Requests
Source: PubMed Central journal article supplement (PMC7962530; doi:10.3390/s21051879), 2021-03-08
Supplement: sensors-21-01879-s001.pdf [file sensors-21-01879-s001.pdf]

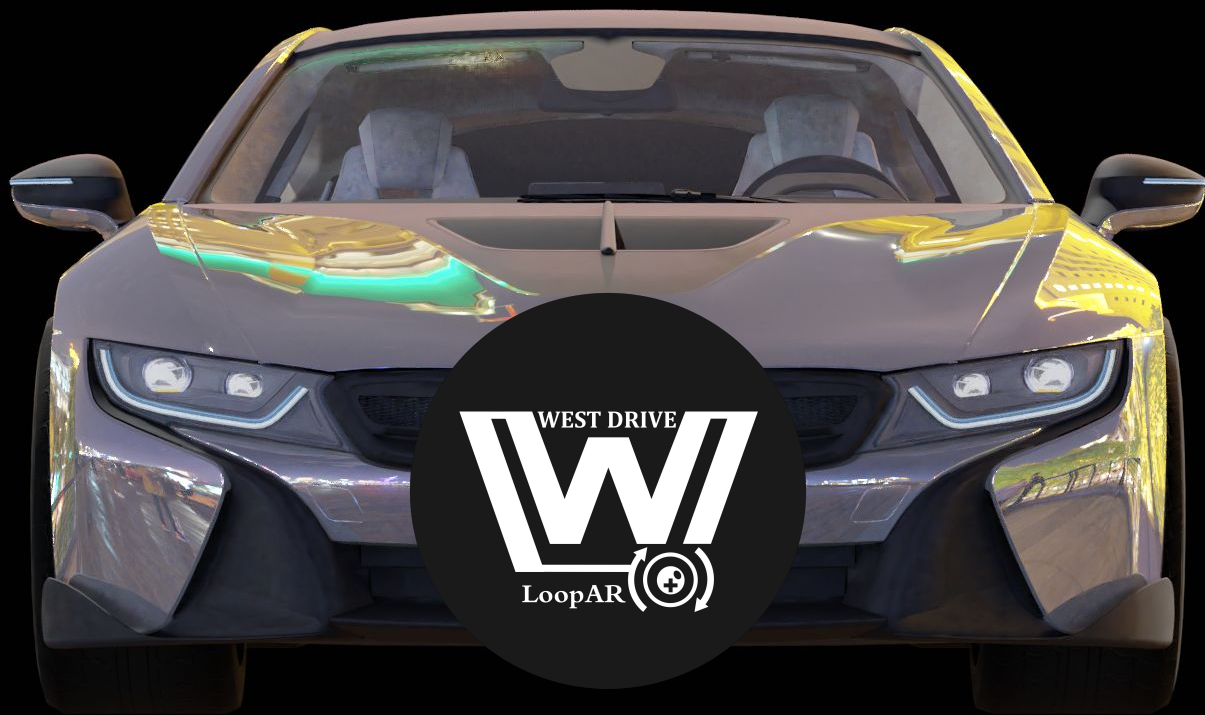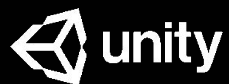

a new approach for human-machine  
interaction research for closing the out-of-the-loop unfamiliarity

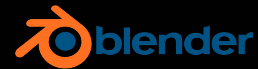

# Virtual Reality

We are using virtual reality headsets for a high presence perception and the psychological sensation of being in an alternate space.

The HTC Vive Pro comes with the Tobii Eye Tracking system and allows monitoring the eye movement of the participant.

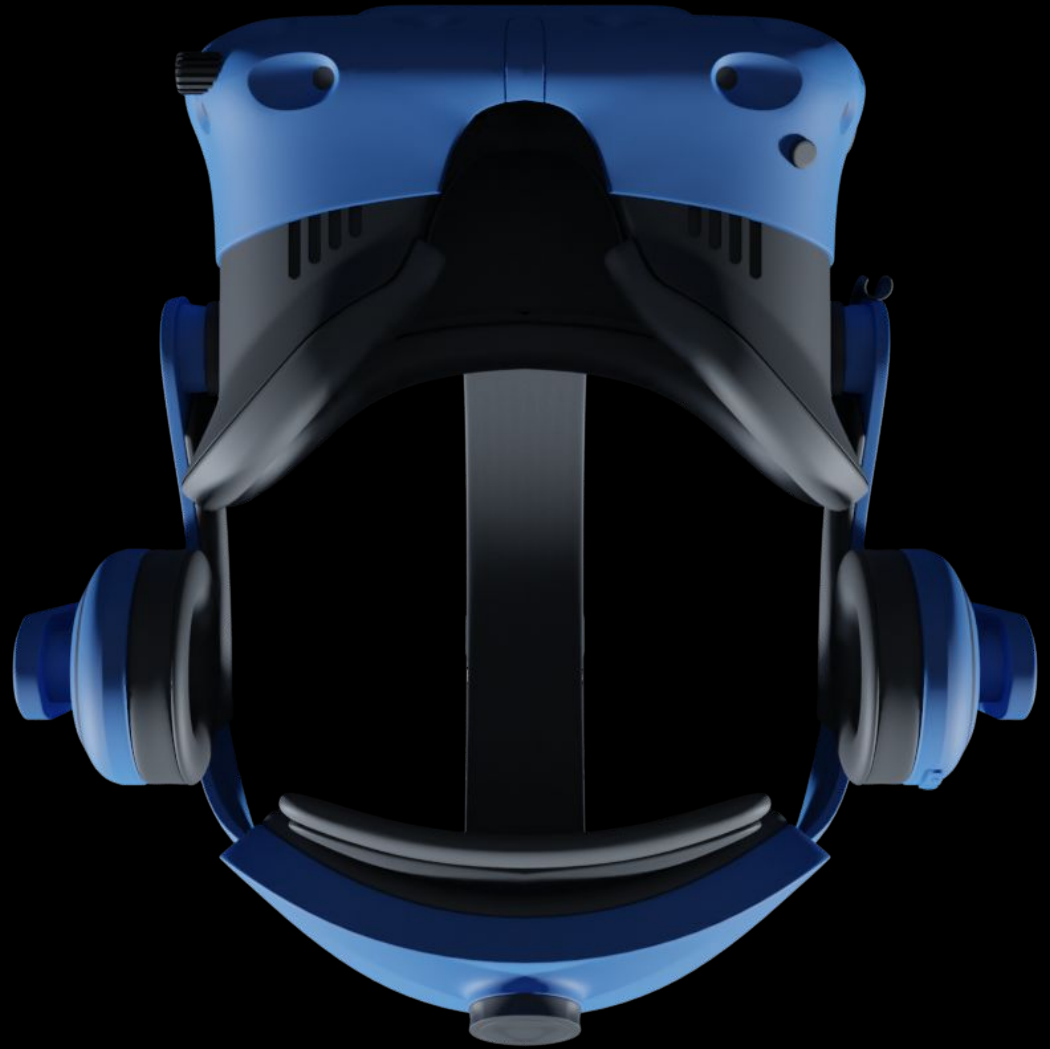

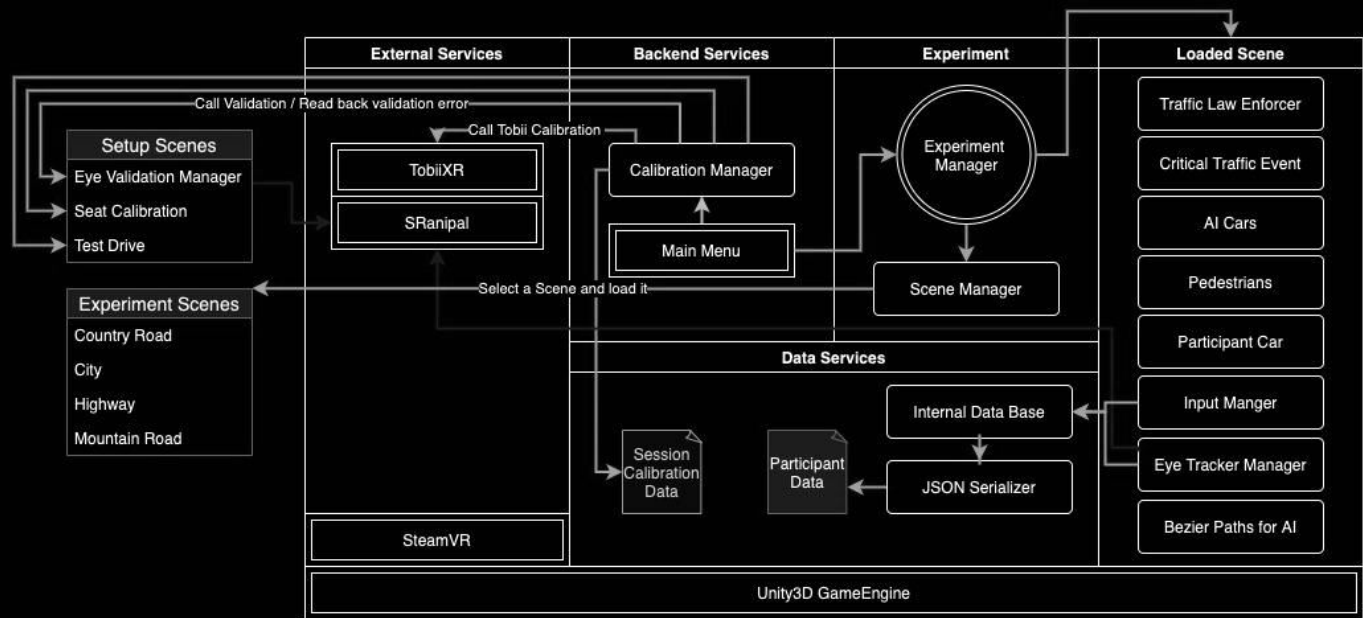

All components and functionalities working together in the Unity3D game engine with different modules for traffic behavior.

Modules Overview

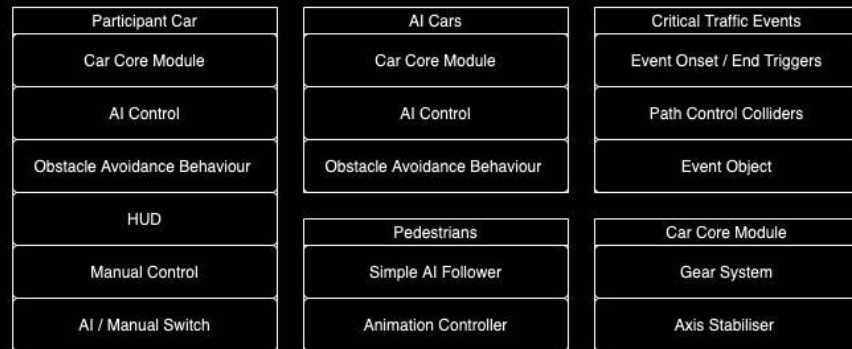

## Level of detail (LOD)

One of the most common techniques for increasing hardware performance. Based on the ratio of the objects screen space height to the total screen height, different LODs will be activated. The objects geometry will be reduced in relation to the participant distance.

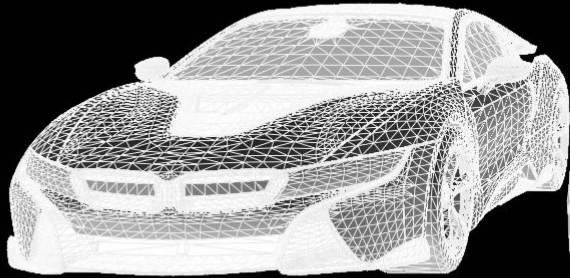

LOD\_0  
80k vertices

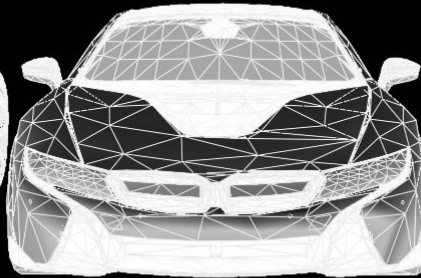

LOD\_1  
40k vertices

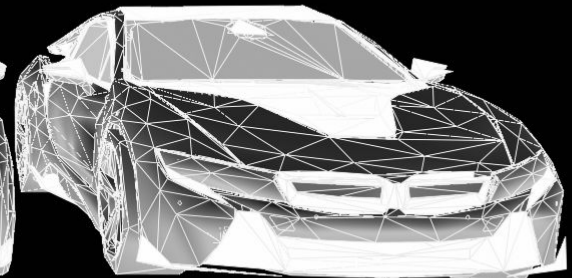

LOD\_2  
10k vertices

All pedestrians were created with Adobe Fuse Character Creator and animated with the Mixamo motion capture library.

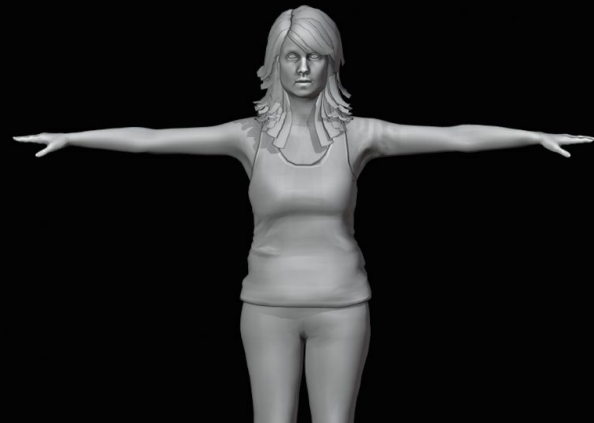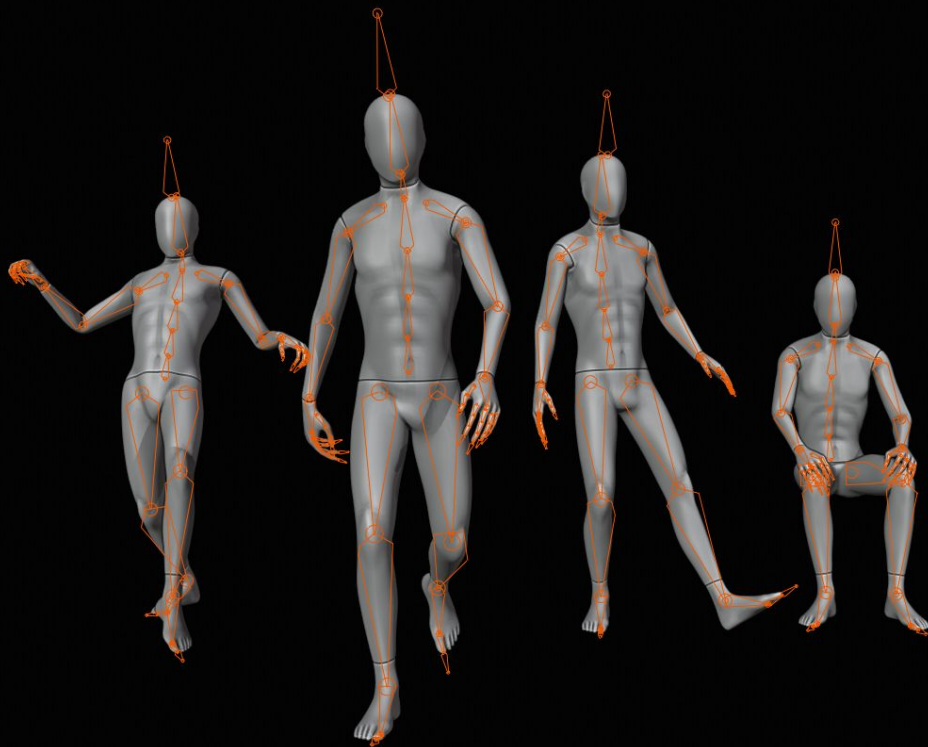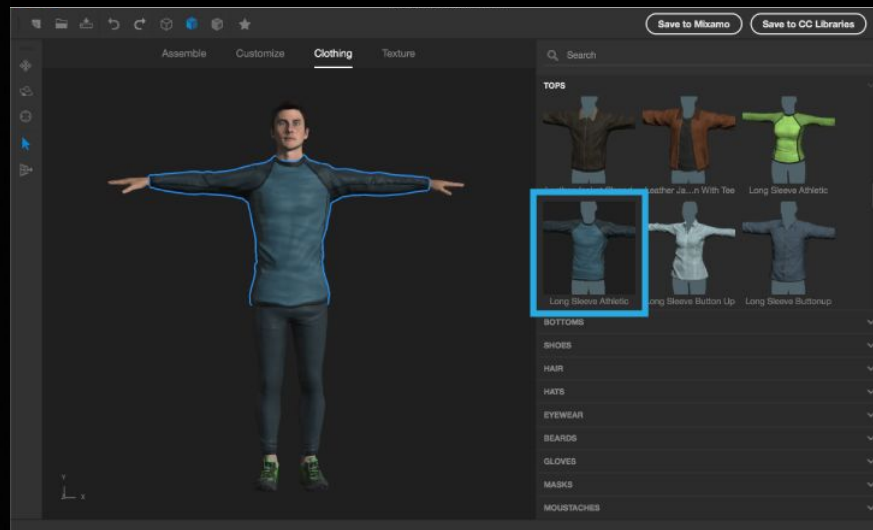

## List of assets

| Asset Name                           | Link on Asset Store                  | Description                                                                                                                                                                                                                                 | Paid / Free | Essential / Optional           |
|--------------------------------------|--------------------------------------|---------------------------------------------------------------------------------------------------------------------------------------------------------------------------------------------------------------------------------------------|-------------|--------------------------------|
| + SteamVR                            | SteamVR Plugin                       | main api to use HTV Vive/ Vive Pro HMDs in Unity3d                                                                                                                                                                                          | free        | <a href="#">note</a> Essential |
| * SS07                               | Unlock super sport car #07           | one of the car assets used in the project                                                                                                                                                                                                   | paid        | <a href="#">note</a> Optional  |
| * EasyRoads3D v3 pro                 | EasyRoads3D v3 pro                   | Create unique road networks directly in Unity with both built-in customizable dynamic crossing prefabs and custom crossing prefabs based on your own imported models                                                                        | paid        | <a href="#">note</a> Essential |
| Conifers [BOTD]                      | Conifers                             | this package contains 4 conifers derived from Unity's Book of the Dead Demo – reworked, optimized and imported using the Custom Tree Importer to make them compatible with the "legacy" rendering pipeline.                                 | free        | <a href="#">note</a> Optional  |
| Standard Assets                      | Standard Assets                      | This collection of assets, scripts, and example scenes can be used to kickstart your Unity learning or be used as the basis for your own projects.                                                                                          | free        | <a href="#">note</a> Optional  |
| Grass Flowers Pack Free              | Grass Flowers Pack Free              | This pack contains 12 grass and flower textures(Resolution 1024x1024,Alpha Channel).                                                                                                                                                        | free        | <a href="#">note</a> Optional  |
| Rocky Hills Environment - light pack | Rocky Hills Environment - light pack | High quality, low poly model pack, good for any kind of platform, mobile friendly and very aesthetic for higher quality game development. Includes models from a early project. Each model from the Legacy project comes with 2 Lod levels. | free        | <a href="#">note</a> Optional  |
| Terrain Tools Sample Asset Pack      | Terrain Tools Sample Asset Pack      | The Terrain Tools Sample Asset Pack contains a collection of Assets to jump-start development for users interested in utilizing Unity's growing Terrain system.                                                                             | free        | <a href="#">note</a> Optional  |
| Farm Machinery                       | Farm Machinery                       | This is a low poly style model pack of a farm tractor and a planter.                                                                                                                                                                        | free        | <a href="#">note</a> Optional  |
| Wooden Box                           | Wooden Box                           | This package contains a wooden box in four states: One intact and three destroyed versions.                                                                                                                                                 | free        | <a href="#">note</a> Optional  |

With a high variety of graphical assets we build an authentic environment for collecting scientific data.

The Unity Store and the platform SketchFab provide a high variety of free 3D models for all different kinds of virtual experimental setups.

Large terrain with  
continues road network of  
the length of roughly 11  
kilometers

Main terrain  
includes a city, a  
mountain road, a country  
road and a highway

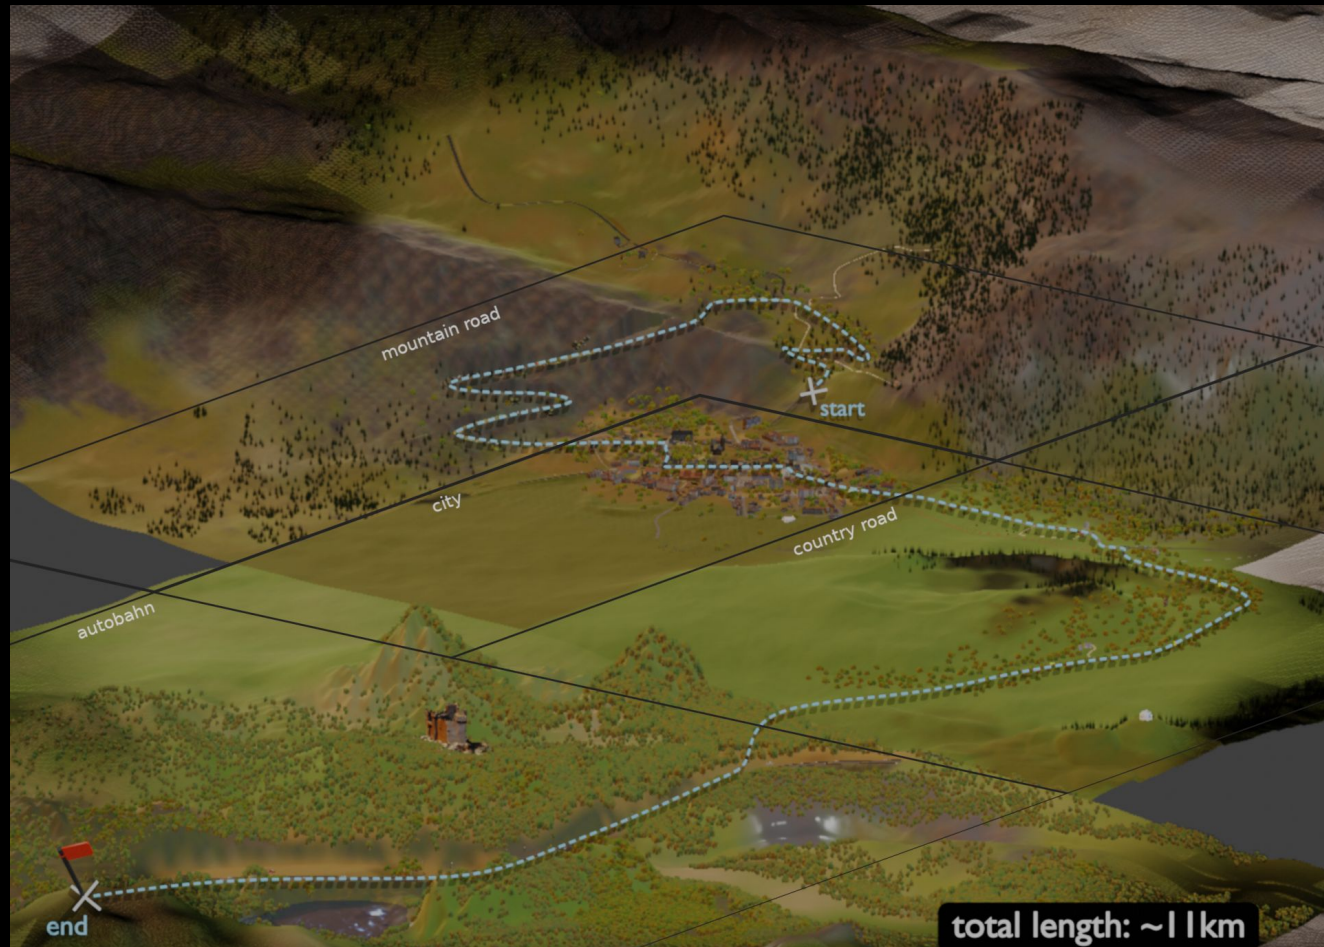

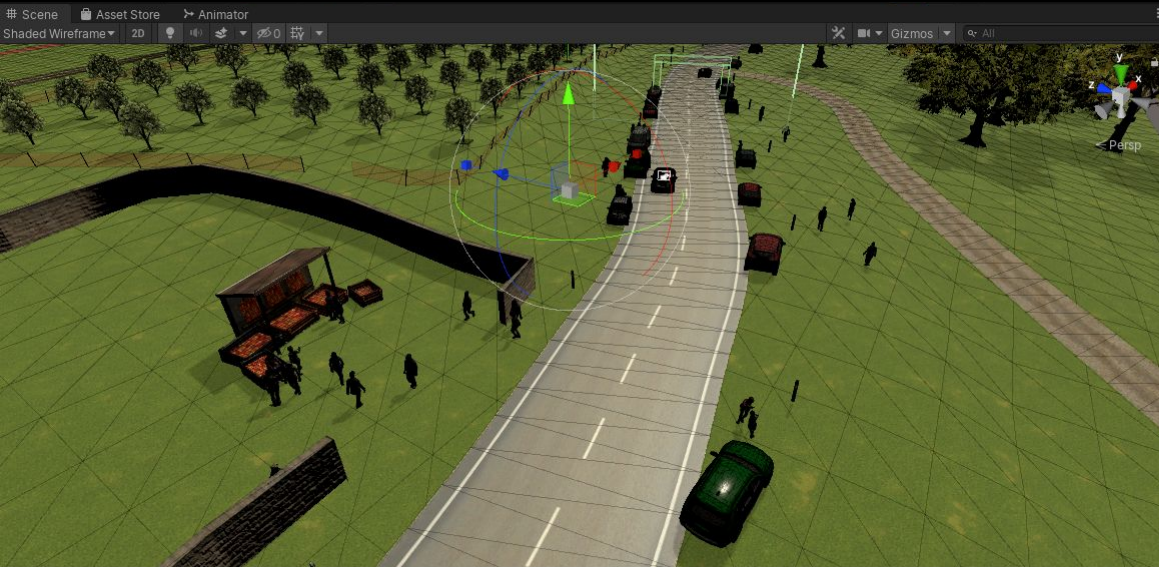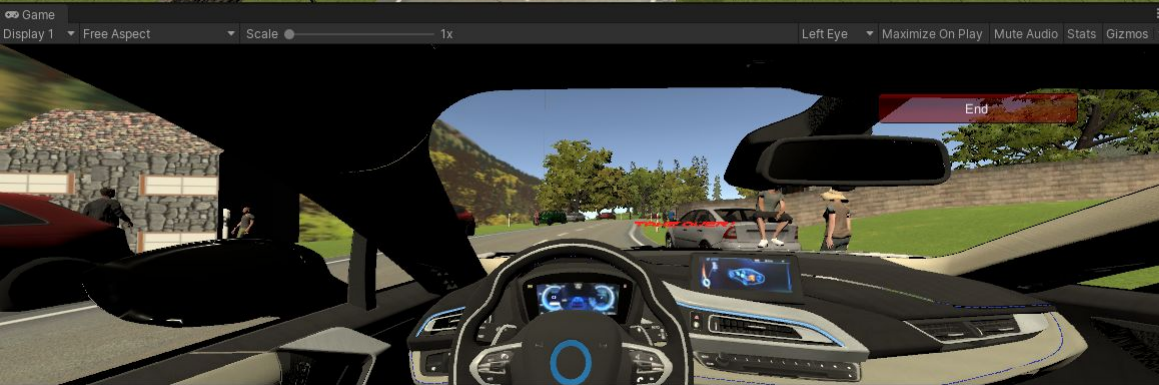A screenshot of the Unity3D engine's Hierarchy, Inspector, and Console panels. The Hierarchy panel on the left shows a tree structure of objects, with 'MarketPlaceEvent' selected. The Inspector panel on the right displays the properties of the 'MarketPlaceEvent' component, including its Transform (Position, Rotation, Scale) and the 'Critical Event Controller (Script)' component. The Console panel at the bottom shows a project view with folders for 'Assets' and 'Scenes', and a list of scene assets like 'Animation', 'Autobahn', 'Baumes\_01', and 'countryro...'.

**Hierarchy**

- Connection Objects
  - Cars
  - Traffic
  - Nature
  - City Details
  - Street modifications
  - Landmarks
  - Countryroad\_Terrain
  - Directional Light
  - Background
- Functionalities
  - VRcam
  - ChaseCam
  - ExperimentManager
  - EyeTrackingManager
  - TrafficEventSystem
  - ManagerGroup
  - Participant'sCar
  - Pedestrians
  - AICars
  - Paths
  - ActivationTriggers
  - SpeedLimitTriggers
  - MVPCriticalTrafficEvents
    - MarketPlaceEvent
      - StageEvent
      - BrokenCarEvent
        - ConsistentEventObjects
          - EventObjects

**Inspector**

Inspector   GitHub   Lighting

MarketPlaceEvent   Static

Tag Untagged   Layer Default

**Transform**

|          |            |             |             |
|----------|------------|-------------|-------------|
| Position | X -3.62085 | Y -0.553268 | Z -3.596558 |
| Rotation | X 0.008    | Y 0.203     | Z -0.039    |
| Scale    | X 1        | Y 1         | Z 1         |

**Critical Event Controller (Script)**

Script CriticalEventController

**Consistent Event Objects**

|                          |                               |
|--------------------------|-------------------------------|
| Start Trigger            | Trigger (TrafficEventTrigger) |
| End Trigger              | Trigger (TrafficEventTrigger) |
| Consistent Event Objects | ConsistentEventObjects        |

**Event Objects**

|                     |              |
|---------------------|--------------|
| Event Object Parent | EventObjects |
| Event Objects       |              |
| Respawn Point       | RespawnPoint |

**Event Setting**

|                     |                          |
|---------------------|--------------------------|
| Event Idle Duration | 10                       |
| Event Object Active | <input type="checkbox"/> |

Add Component

**Console**

Project

Assets > Scenes

- SRF
- osmRefe
- Plugins
- Prefabs
- Samples
- Terral
  - 0.1
    - T
- Scenes
- Scripts
  - Analyt
  - Calibr
  - Cars
    - AIB
    - Car
    - Eve
    - Mai
    - Visit
    - Conne

functional experiment scene (country road) in the Unity3D engine



Fully customizable in augmented reality head up display on the car's windshield.

Highlighting the speed limit, current speed, critical event and objects of interest as well as car's working mode.

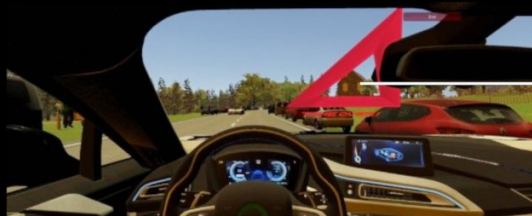

warning sign

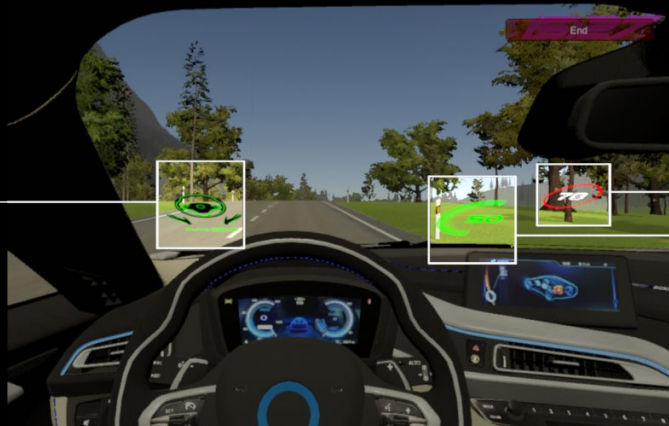

local speed limit

auto/manual drive

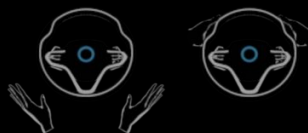

HUD visual components

vehicle speed

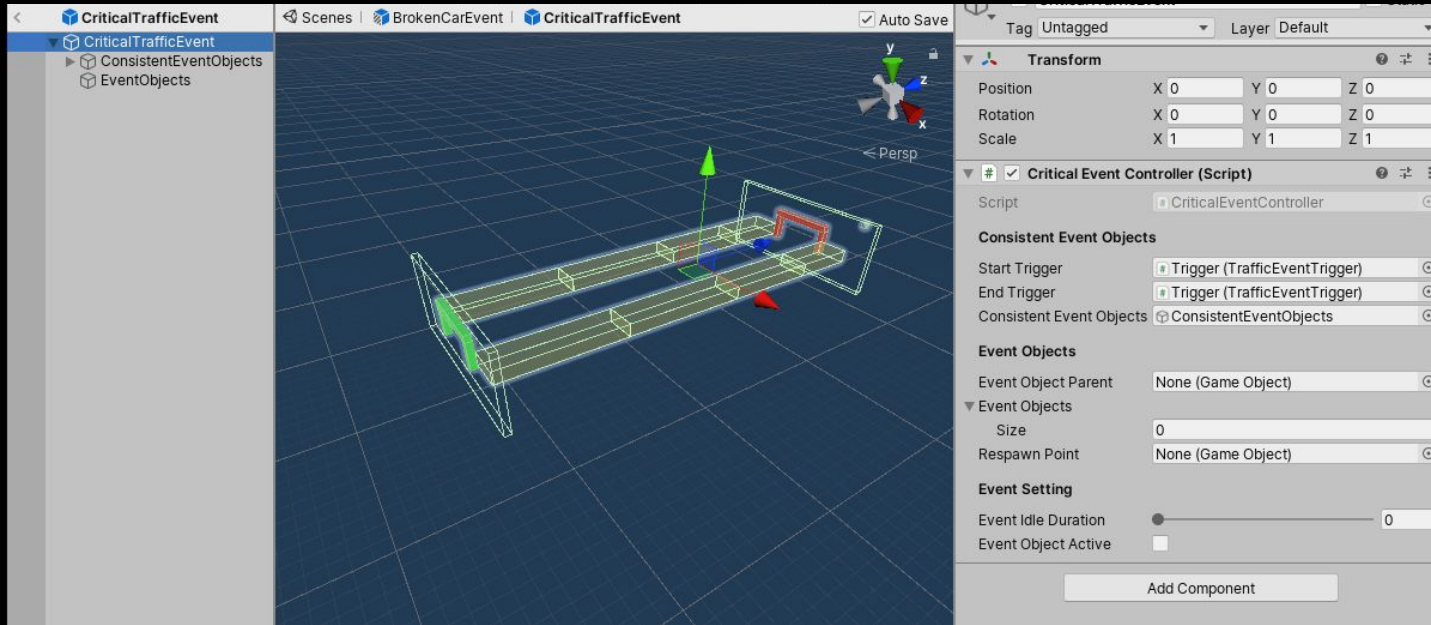

Custom prefabricated event system with editor visuals to facilitate creation of time sensitive and traffic related events.

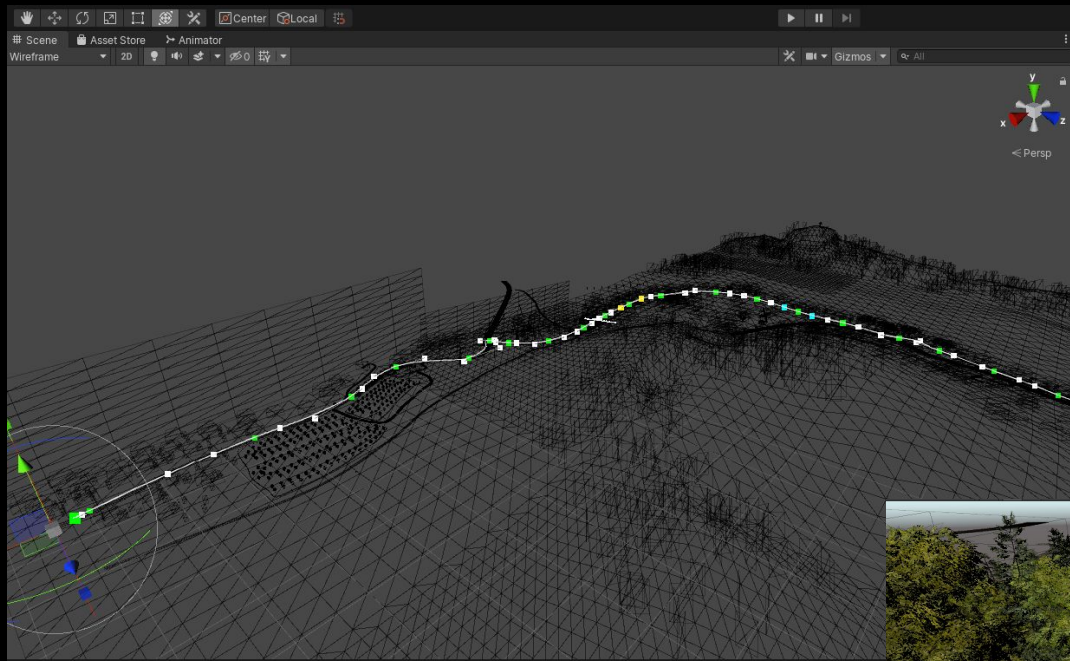

car path based on bezier curve in the Unity3D engine

Bezier curve path creation system with full control on nodes to create custom path for dynamic objects including cars, pedestrians and event objects

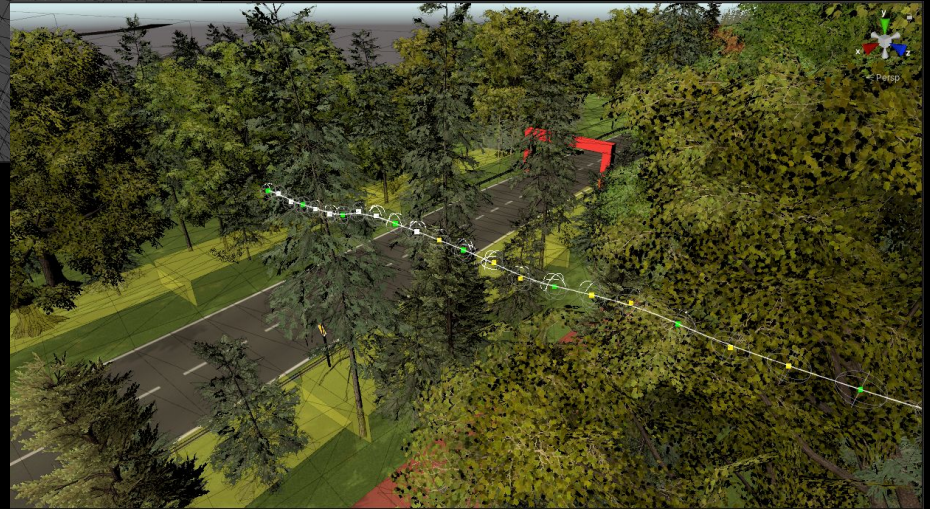

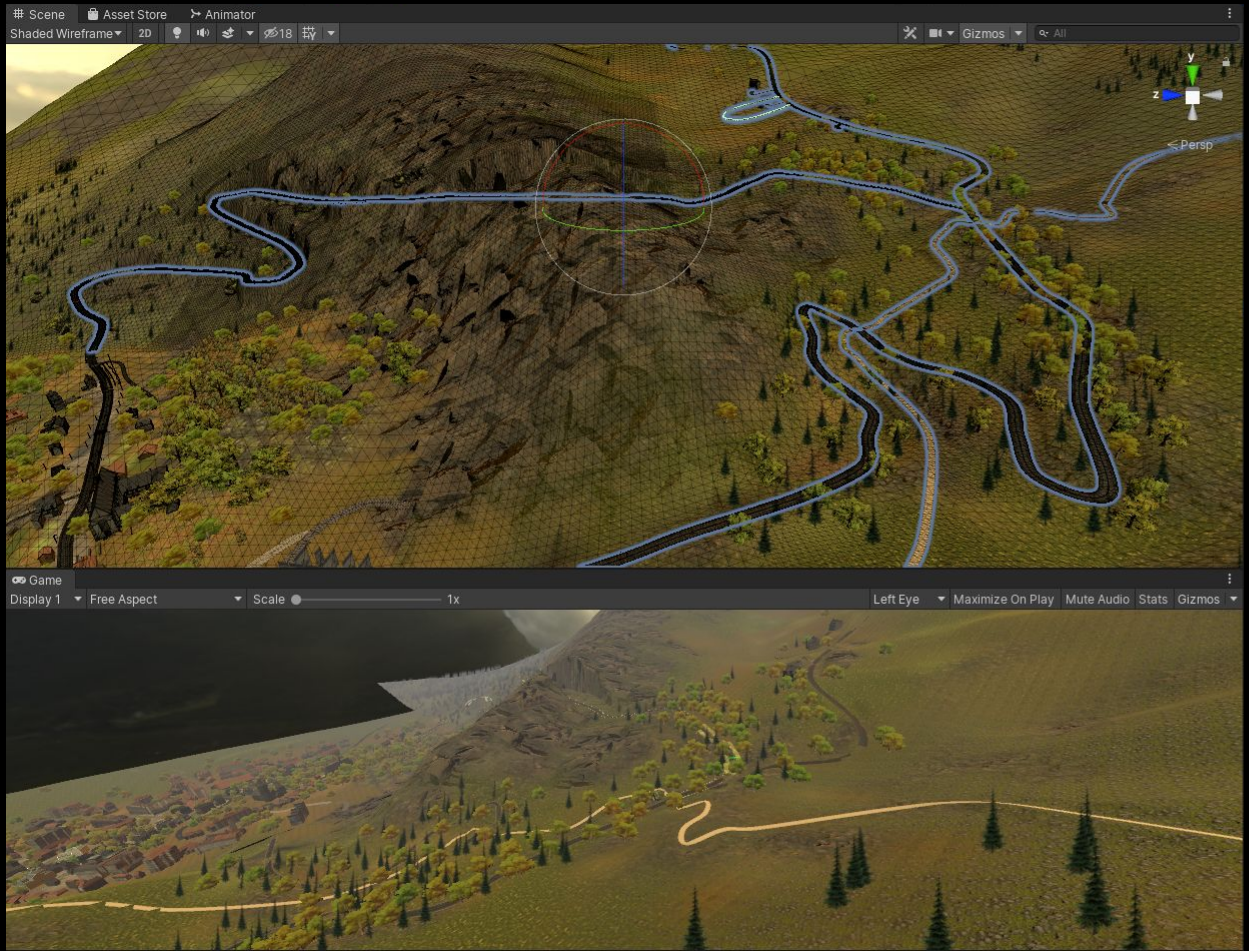

the mountain road scene in Unity3D engine

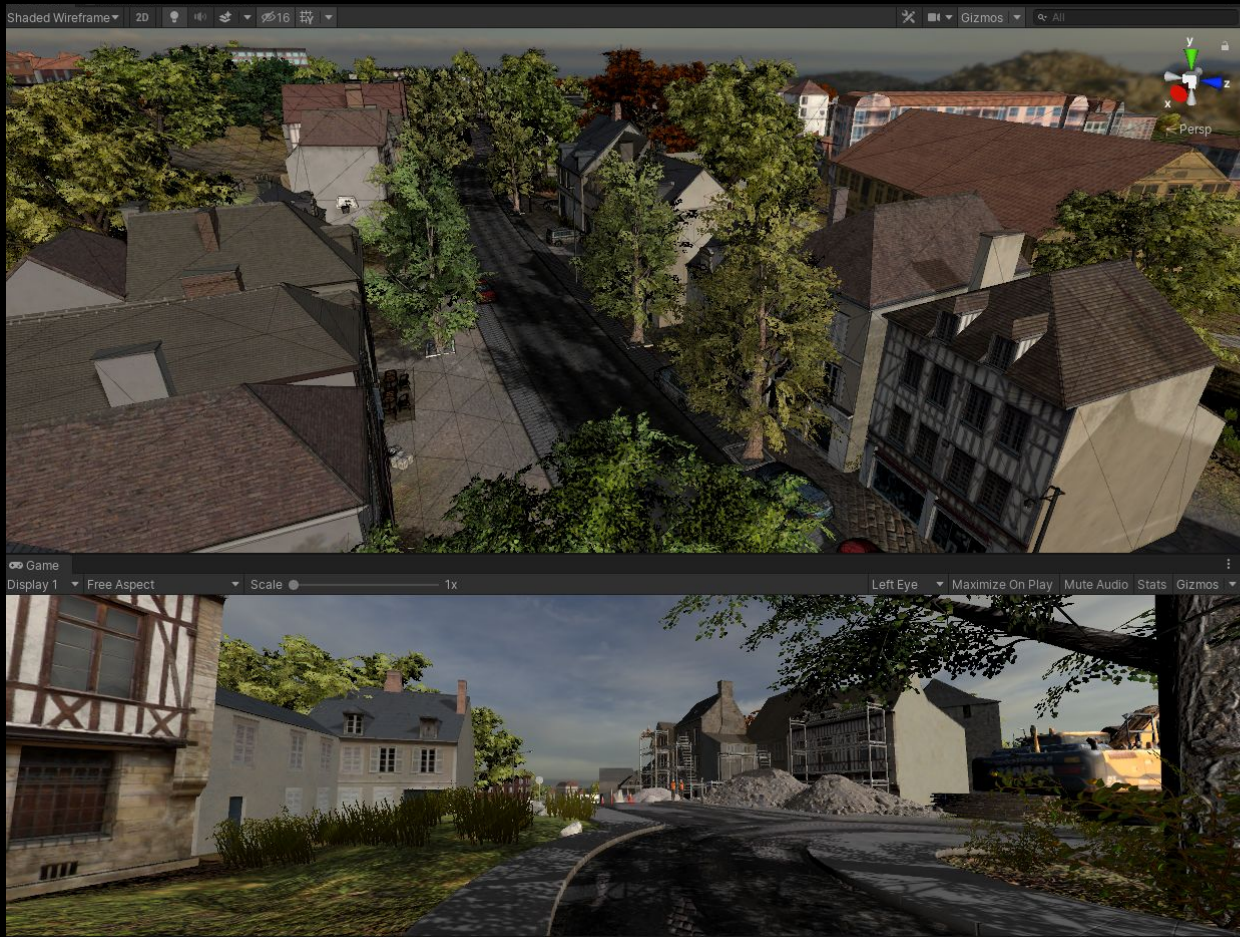

the city scene in Unity3D engine

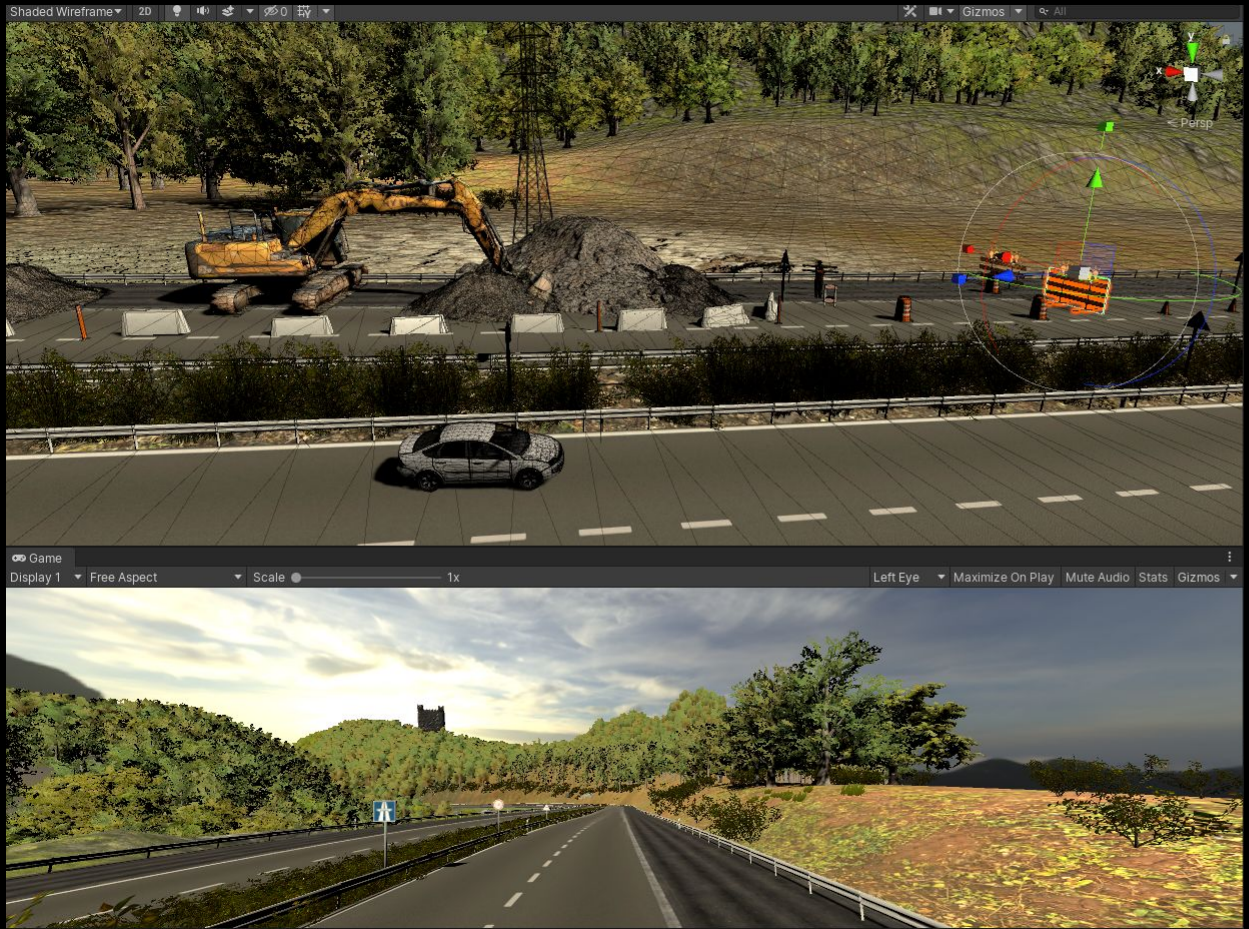

the autobahn scene in Unity3D engine

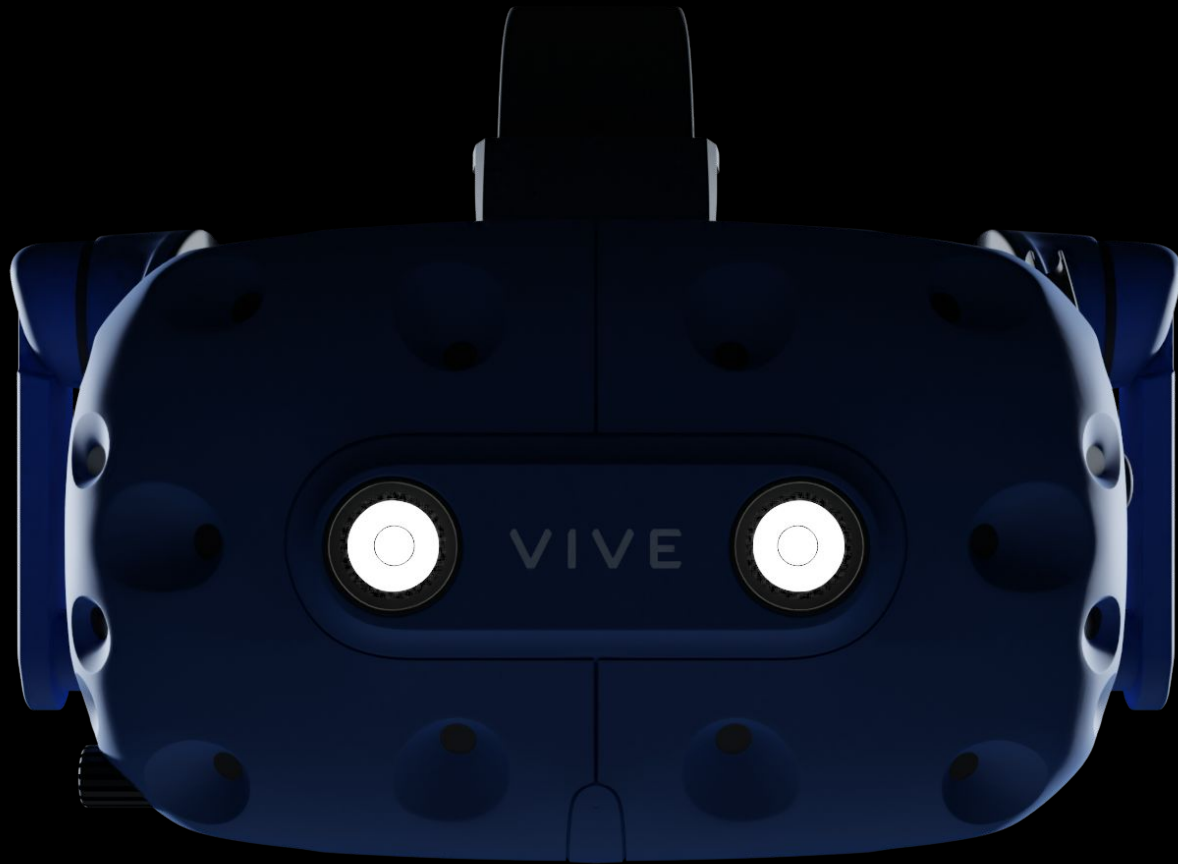

For future VR research, we tried to build the LoopAR project as easy to use toolkit inside of Unity3D, to easily produce further virtual reality experiments.
